# Supplementary material for: Applicability of liquid biopsies to represent the mutational profile of tumor tissue from different cancer entities
Source: PubMed Central journal article supplement (PMC8376638; doi:10.1038/s41388-021-01928-w), 2021-07-06
Supplement: 41388_2021_1928_MOESM1_ESM.pdf [file 41388_2021_1928_MOESM1_ESM.pdf]

Supplementary Figure 1

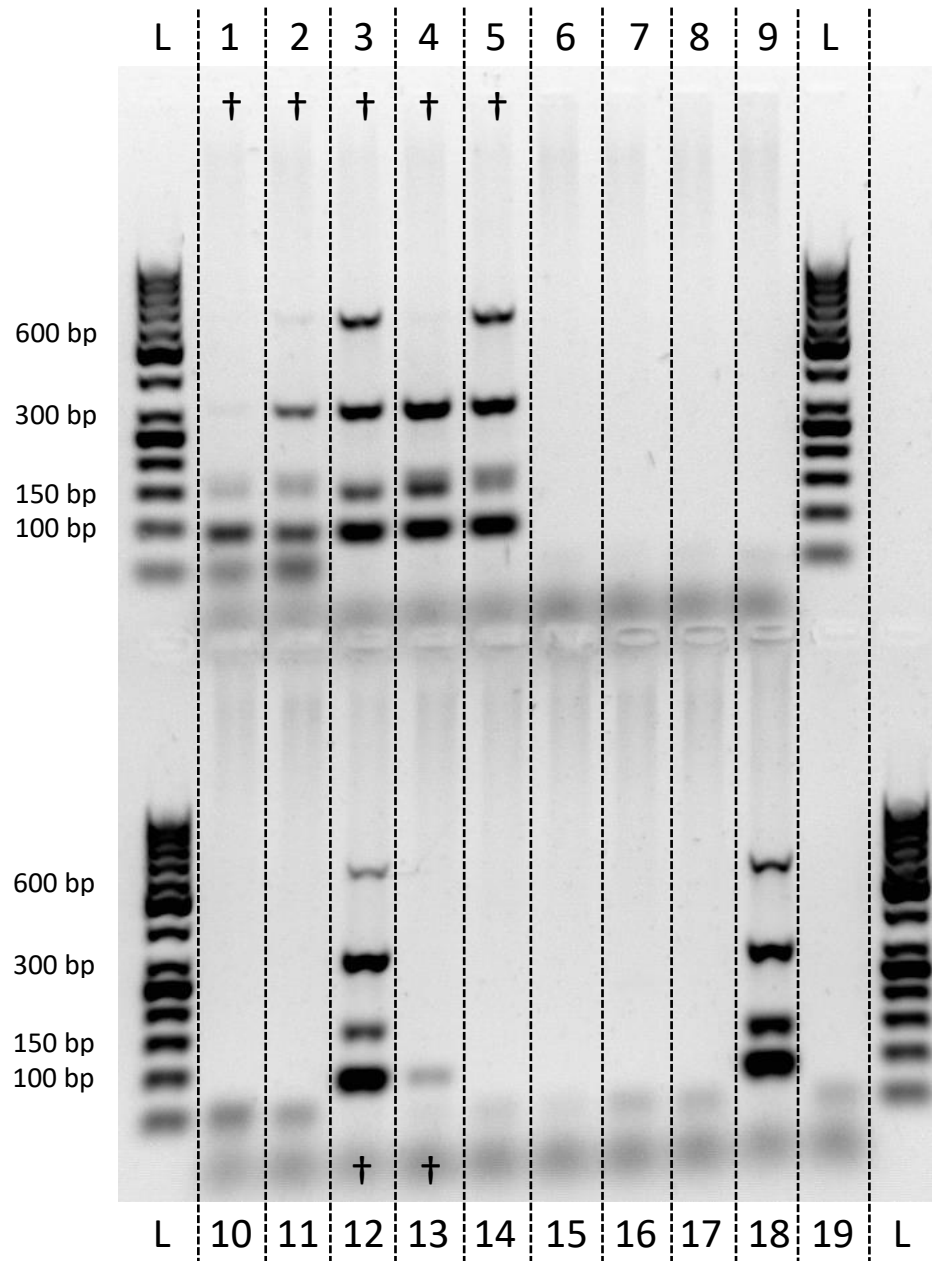

- 1: CRC001.1\_R (1 CTC)
- 2: CRC001.1\_F (5 CTCs)
- 3: CRC002.1\_R (13 CTCs)
- 4: CRC002.1\_R (8 CTCs)
- 5: CRC002.1\_F (5 CTCs)
- 6: CRC003.1\_R (1 CTC)
- 7: CRC004.1\_R (3 CTCs)
- 8: CRC005.1\_R (2 CTCs)
- 9: CRC006.1\_R (5 CTCs)
- 10: HNSCC002.1\_R (1 CTC)
- 11: HNSCC004.1\_R (1 CTC)
- 12: HNSCC004.1\_F (1 CTC)
- 13: HNSCC006.1\_R (6 CTCs)
- 14: MEL001.1\_R (1 CTC)
- 15: MEL003.1\_R (5 CTCs)
- 16: MEL004.1\_R (1 CTC)
- 17: LS174T cell line (3 cells)
- 18: Pos. Ctrl (WGA of gDNA)
- 19: Neg. Ctrl (WGA of H<sub>2</sub>O)
