# Supplementary material for: Applicability of liquid biopsies to represent the mutational profile of tumor tissue from different cancer entities
Source: PubMed Central journal article supplement (PMC8376638; doi:10.1038/s41388-021-01928-w), 2021-07-06

Supplementary Figure 2

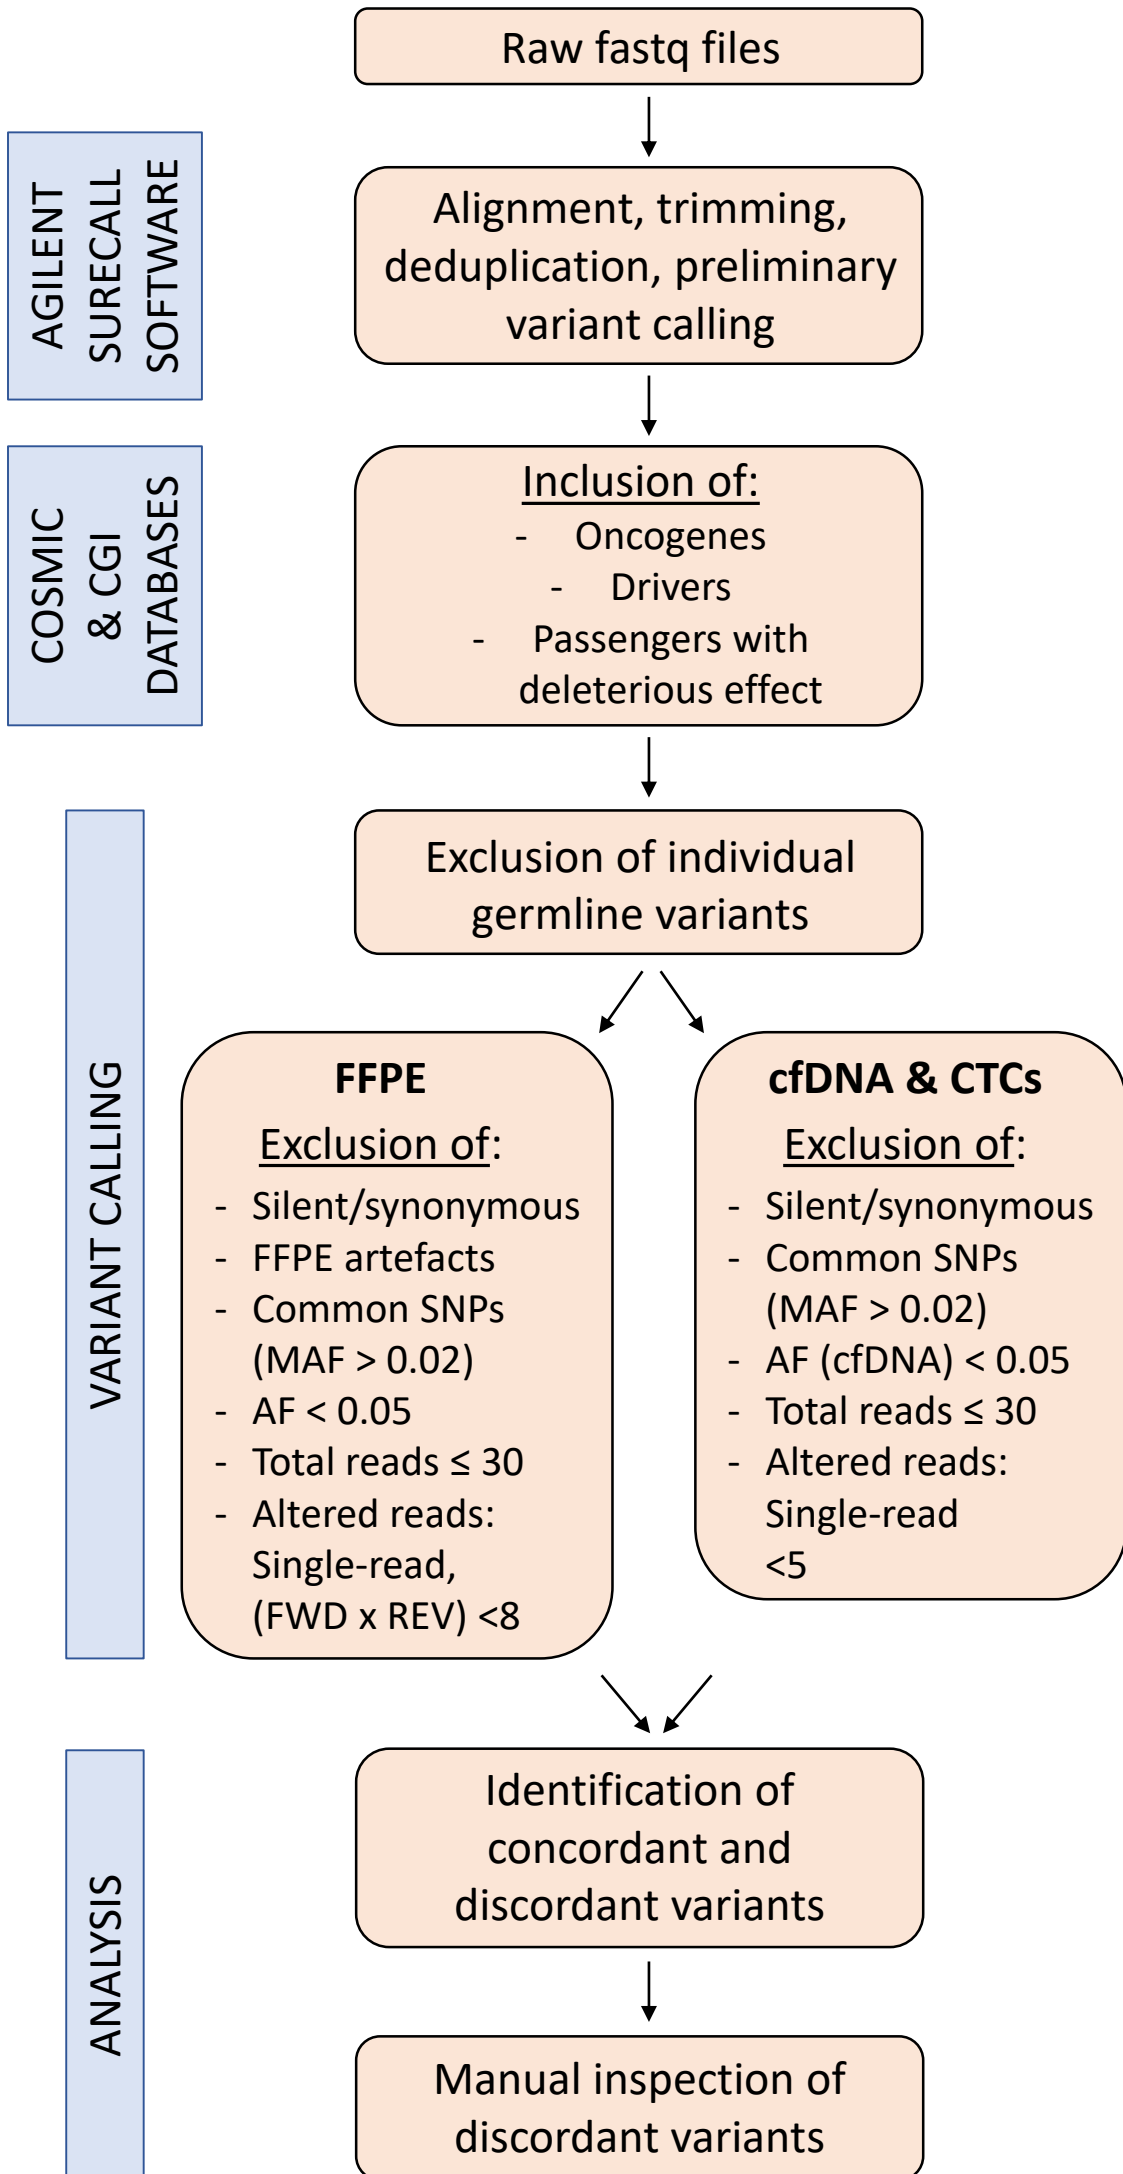

Supplement: 41388_2021_1928_MOESM2_ESM.pdf [file 41388_2021_1928_MOESM2_ESM.pdf]
